# Supplementary material for: Proof-of-concept for facile perovskite solar cell recycling
Source: Royal Society of Chemistry journal article supplement (doi:10.1039/c6ee02013e), 2016-01-01
Supplement: c6ee02013e1.pdf [file c6ee02013e1.pdf]

# Proof-of-Concept for Facile Perovskite Solar Cell Recycling

## Supporting Information

Jeannette M. Kadro<sup>1§</sup>, Norman Pellet<sup>2,3,§</sup>, Fabrizio Giordano<sup>2</sup>, Alexey Ulianov<sup>4</sup>, Othmar Müntener<sup>4</sup>, Joachim Maier<sup>3</sup>, Michael Grätzel<sup>2,3\*</sup> and Anders Hagfeldt<sup>1\*</sup>

1-Laboratory for Photomolecular Science, Ecole Polytechnique Fédérale de Lausanne, 1015 Lausanne, Switzerland

2-Laboratory for Photonics and Interfaces, Ecole Polytechnique Fédérale de Lausanne, 1015 Lausanne, Switzerland

3- Max Planck Institute for Solid State Research, Heisenbergstraße 1, 70569 Stuttgart, Germany

4- Institut des Sciences de la Terre, Université de Lausanne 1015 Lausanne, Switzerland

§ these authors have contributed equally

\*corresponding authors : [michael.gratzel@epfl.ch](mailto:michael.gratzel@epfl.ch), [anders.hagfeldt@epfl.ch](mailto:anders.hagfeldt@epfl.ch)

# 1. Process

Photographs of the samples at each processing step are shown below.

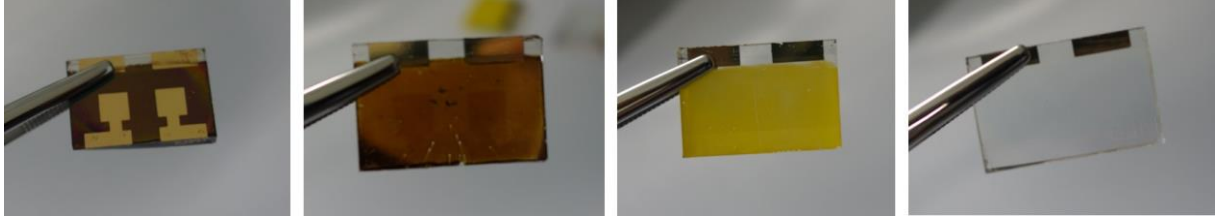

*Figure S 1* Photographs of solar cell devices before recycling, after removal of the cathode, after dissolution of MAI and after removal of  $\text{PbI}_2$

Gold removal in chlorobenzene is shown below.

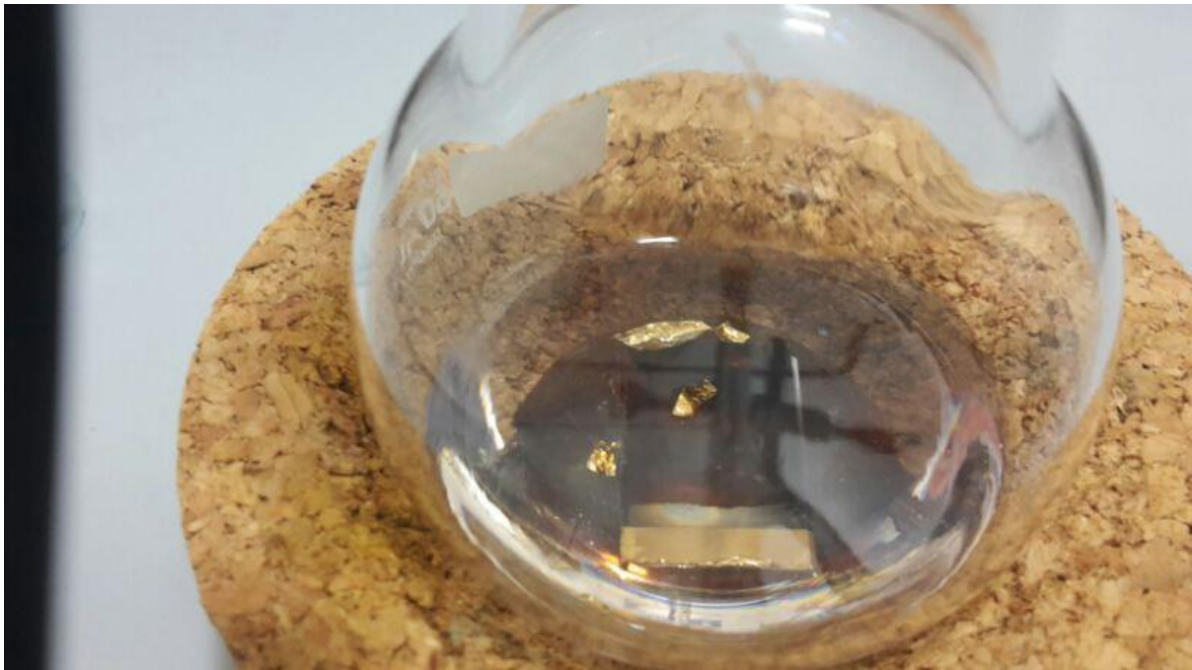

*Figure S 2* Gold removal in chlorobenzene bath

## 2. X-ray fluorescence (XRF)

XRF was used to assess purity of the recovered metal. Spectra below were taken on commercial gold used for evaporation of the first set of solar cells and on gold recovered from the chlorobenzene bath. Characteristic gold lines indicated in red. XRF spectra were collected on a Fischerscope X-ray XAN with tungsten nickel anticathode.

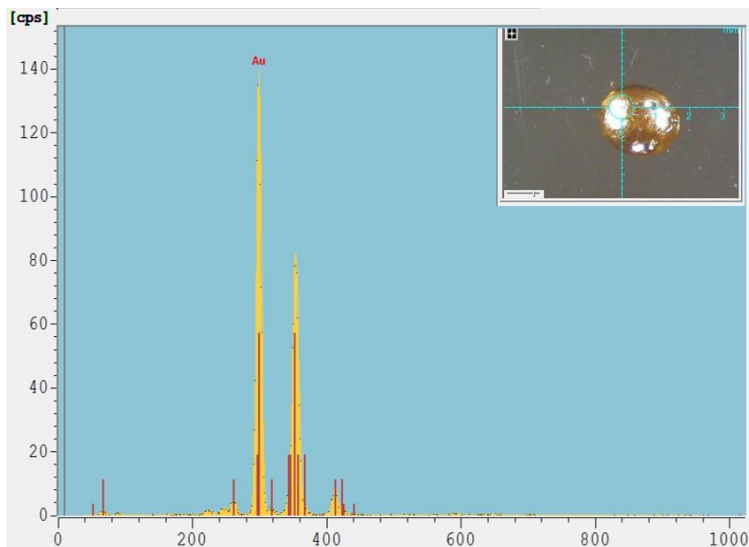

Figure S 3 XRF spectrum of commercial gold sample used for evaporation, inset shows sample

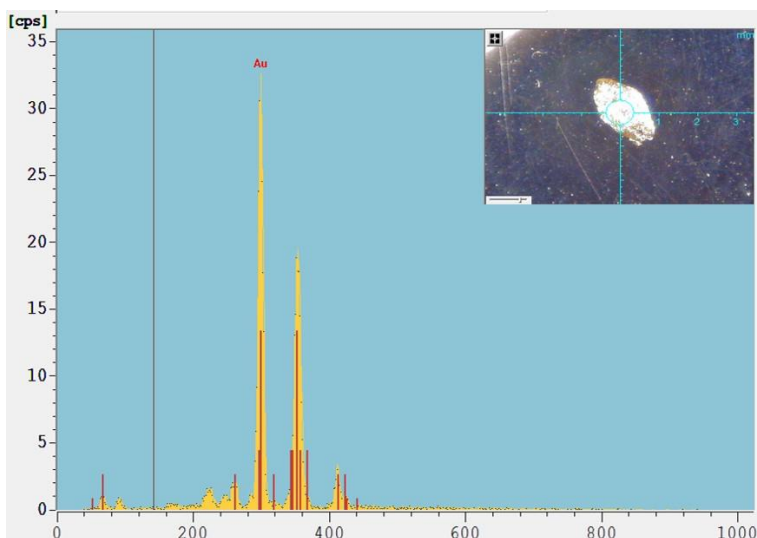

Figure S 4 XRF spectrum of gold recovered after first recycling step, inset shows sample

### 3. Hysteresis

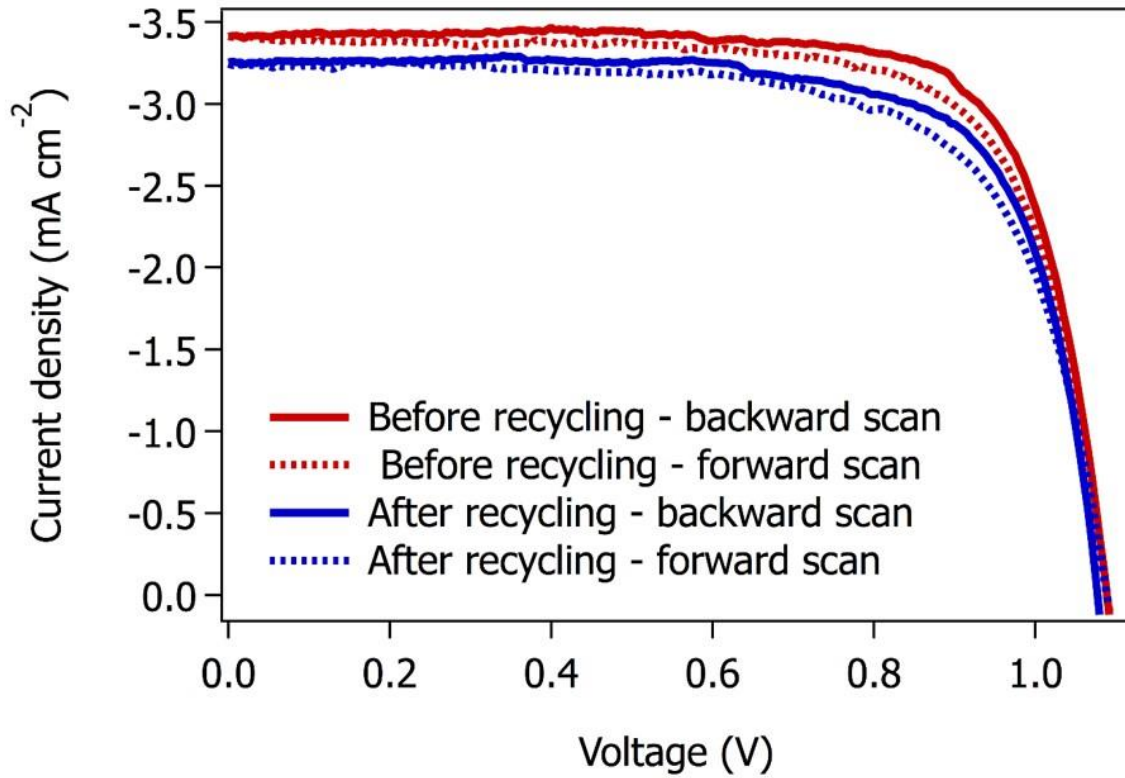

Figure S 5jV-characteristics of PSC device in forward and backwards scan before and after recycling
